# Supplementary material for: CoreSlicer: a web toolkit for analytic morphomics
Source: Springer Nature journal article supplement (doi:10.1186/s12880-019-0316-6), 2019-02-11

a

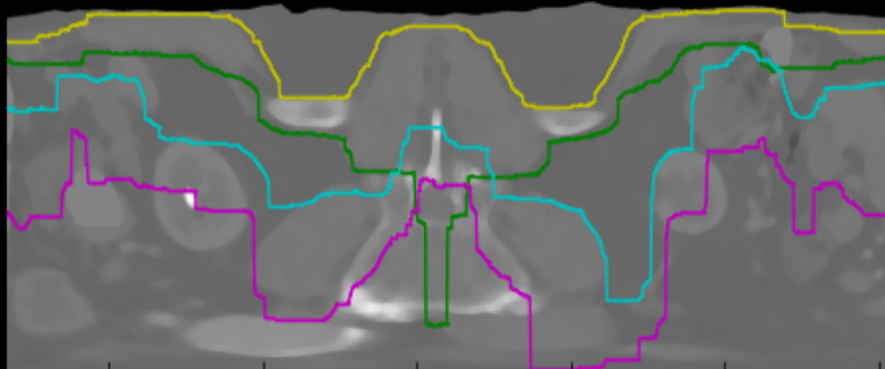

b

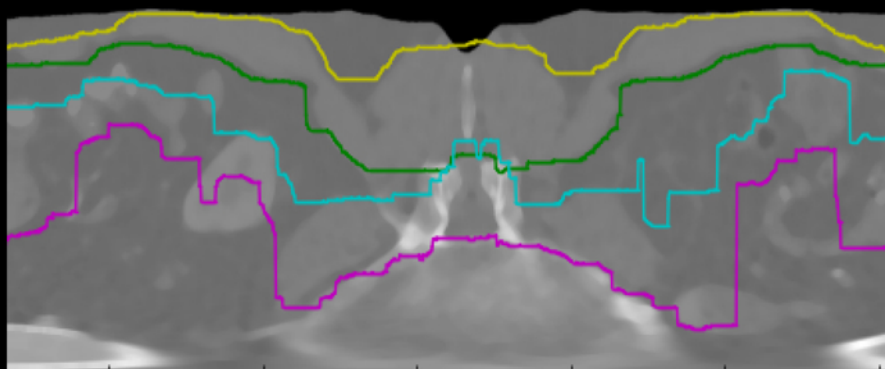

c

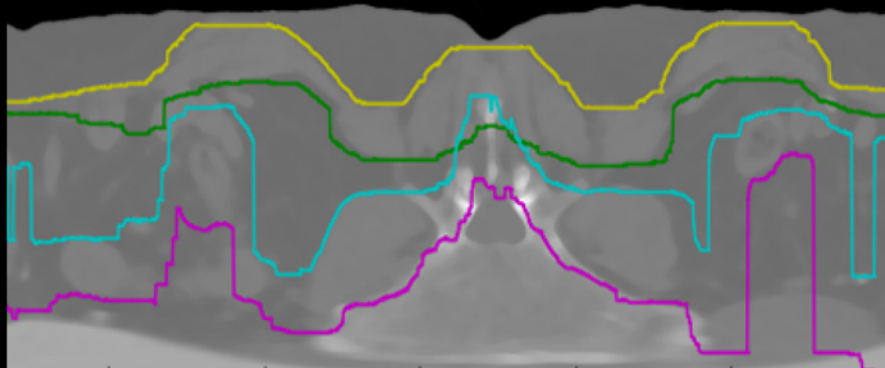

Supplement: MOESM2 [file 16463694]
