# Supplementary material for: CoreSlicer: a web toolkit for analytic morphomics
Source: Springer Nature journal article supplement (doi:10.1186/s12880-019-0316-6), 2019-02-11

Bland-Altman Plot of Difference in VFA, SFA and TLMA  
Between Manual Measurements in CoreSlicer and Automated Segmentation

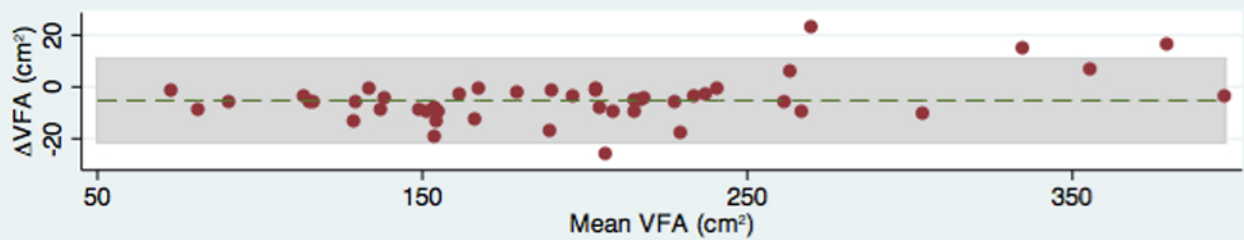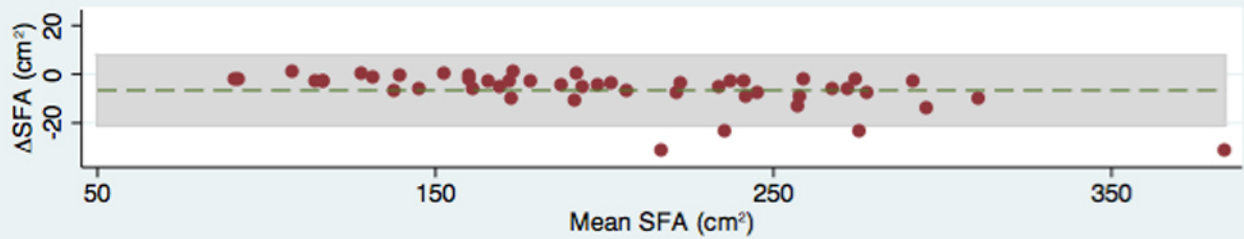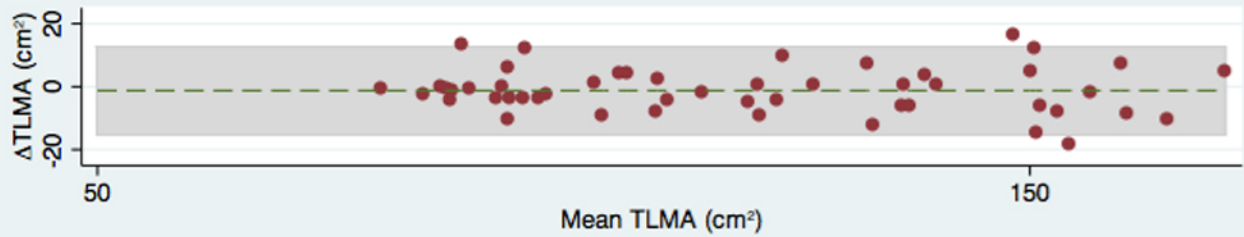

Supplement: MOESM3 [file 16463694]
